# Supplementary material for: Capture and electroreduction of CO2 using highly efficient bimetallic Pd–Ag aerogels paired with carbon nanotubes
Source: Royal Society of Chemistry journal article supplement (doi:10.1039/d1ta01834e), 2021-01-01
Supplement: d1ta01834e1.pdf [file d1ta01834e1.pdf]

## Supporting Information

### **Capture and Electroreduction of CO<sub>2</sub> Using Highly Efficient Bimetallic Pd-Ag Aerogels Paired with Carbon Nanotubes**

Maryam Abdinejad,<sup>a</sup> Celia Ferrag,<sup>a,b</sup> M. Nur Hossain,<sup>a</sup> Meissam Noroozifar,<sup>\*a</sup> Kagan Kerman,<sup>\*a,b</sup> and Heinz Bernhard Kraatz<sup>\*a,b</sup>

Email: [bernie.kraatz@utoronto.ca](mailto:bernie.kraatz@utoronto.ca); [kagan.kerman@utoronto.ca](mailto:kagan.kerman@utoronto.ca); [m.noroozifar@utoronto.ca](mailto:m.noroozifar@utoronto.ca)

a. Department of Physical and Environmental Sciences, University of Toronto Scarborough, 1265 Military Trail, Toronto, ON M1C 1A4, Canada

b. Department of Chemistry, University of Toronto, 80 At. George xStreet, Toronto, ON M5S 3H6, Canada

#### **Table of Contents:**

|                                                                          |    |
|--------------------------------------------------------------------------|----|
| Part S1. Reagents and Chemicals .....                                    | 2  |
| Part S2. Material Characterizations .....                                | 2  |
| Part S3. Synthesis of the Pd <sub>x</sub> Ag <sub>y</sub> Aerogels ..... | 3  |
| Part S4. Electrochemical Measurements .....                              | 4  |
| Part S5. References .....                                                | 20 |

## Part S1. Reagents and Chemicals

All reagents and solvents were of commercial reagent grade and were used without further purification, except where noted.  $\text{AgNO}_3$  (99%),  $\text{CuSO}_4 \cdot 5\text{H}_2\text{O}$ , (99.99%),  $\text{H}_2\text{SO}_4$  ( $\geq 99.99\%$ ),  $\text{K}_2\text{CO}_3$  (99.99%),  $\text{H}_2\text{PdCl}_4$  (99%), glyoxylic acid monohydrate (97%), Chloroform d ( $>99.8\%$ D), Nafion perfluorinated ion-exchange resin (5%), CNT (outer diameter 13–18 nm, length 3–30  $\mu\text{m}$ , purity  $> 99\%$  and functional content  $7.0\% \pm 1.5\%$ ) were purchased from Sigma-Aldrich Company. All the experimental solutions were prepared using deionized water purified by a Millipore Milli-Q water purification system (18.2  $\text{M}\Omega$  cm).

## Part S2. Material Characterizations

NMR data was processed in MestreNova and chemical shifts ( $\delta$ ) were reported in ppm. All of the spectroscopy data for the structural characterizations were obtained using the research facilities at the University of Toronto. The gaseous products from carbon dioxide ( $\text{CO}_2$ ) electro-reduction ( $\text{CO}$ ,  $\text{H}_2$ ) were analysed in 1 mL volumes using a gas chromatograph (PerkinElmer Clarus 680) coupled with a thermal conductivity detector (TCD) and a flame ionization detector (FID), while the liquid product was analysed using a high-resolution ABI/Sciex Qstar gas chromatography-mass spectrometer (GC-MS). The GC was equipped with a packed Molecular Sieve 5A capillary column and a packed HaySep D column. Helium (99.999%) was used as the carrier gas. A helium ionization detector (HID) was used to quantify  $\text{H}_2$  and  $\text{CO}$  concentrations. Surface characterizations were performed using a Hitachi H7500 Scanning Electron Microscopy (SEM, Hitachi, Chiyoda, Tokyo, Japan) and a Quanta Feg 250 Field-Emission Scanning Electron Microscope.

X-ray photoelectric spectroscopy (XPS) analyses were performed with a Theta-probe Thermo-Fisher Scientific Instrument (East Grinstead, UK) with a monochromatic  $\text{K}\alpha$  source with a photo energy of 1486.6 eV. The accumulated angle was  $90^\circ$  with a 20 eV pass energy at the analyser in an 8-10 mbar vacuum chamber. The analysis area was  $500 \mu\text{m}^2$ . The spectra were processed using the system's software (Avantage v5.986). A modified Shirley background was used for the baseline. A 30% Lorentzian/Gaussian mix was used for symmetric peaks; however, this was allowed to vary for the asymmetric peaks (C 1s  $\text{sp}^2$  peak, and the main Pd 3d spin-orbit pairs). The  $3\text{d}_{3/2}$  features were constrained to the  $3\text{d}_{5/2}$  features for both Ag and Pd using the appropriate spin-

orbit parameters. This was also done for the Pd 3p spin-orbit pair as the O 1s peak overlaps with Pd 3p<sub>3/2</sub> peak. Thus, by collecting the Pd 3p<sub>1/2</sub> and applying the spin-orbit parameters, the Pd 3p<sub>3/2</sub> contribution to the O 1s peak intensity could be subtracted out.

### Part S3. Synthesis of the Pd<sub>x</sub>Ag<sub>y</sub> Aerogels

The Pd<sub>x</sub>Ag<sub>y</sub> hydrogels, were prepared using a simple procedure. First, an aqueous solution of potassium carbonate (K<sub>2</sub>CO<sub>3</sub>) and glyoxylic acid monohydrate (with the ratio of 1:5) was added into a 10 mL solution of H<sub>2</sub>PdCl<sub>4</sub> (0.2 mM) and AgNO<sub>3</sub> (0.2 mM) under mild stirring.<sup>1</sup> The mixture was then sonicated for 10 minutes to achieve a bright yellow solution.<sup>2</sup> Next, the glassy vial containing the suspension was transferred into the oven and allowed to settle at 70 °C for 45 min to obtain a dark grey color signifying completion of the reduction reaction. Afterwards, the temperature was decreased to 40 °C for another 3 h to form a black Pd<sub>x</sub>Ag<sub>y</sub> hydrogel at the bottom of the vial. The ratio of the Pd<sub>x</sub>Ag<sub>y</sub> hydrogels was controlled by tuning the ratio of H<sub>2</sub>PdCl<sub>4</sub> and AgNO<sub>3</sub>.

After the hydrogels were synthesized, they were repeatedly washed with distilled water, ethanol, and acetone (20 mL, 3 times each in sequences) followed by overnight freeze-drying using a lyophilizer to obtain porous Pd<sub>0.5</sub>Ag<sub>0.5</sub>, Pd<sub>0.57</sub>Ag<sub>0.43</sub>, Pd<sub>0.67</sub>Ag<sub>0.33</sub>, and Pd<sub>0.8</sub>Ag<sub>0.2</sub> aerogels. The Pd<sub>x</sub>Ag<sub>y</sub>/CNT aerogels were synthesised using a similar method by adding and dispersing 1 mg CNT in aqueous metal salt solutions. To prepare the electrode, a portion of the ground aerogels was mixed with Nafion (2%), then 2 μL of the mixture was drop casted onto a pre-cleaned GCE (0.072 cm<sup>2</sup>) and allowed to air dry.

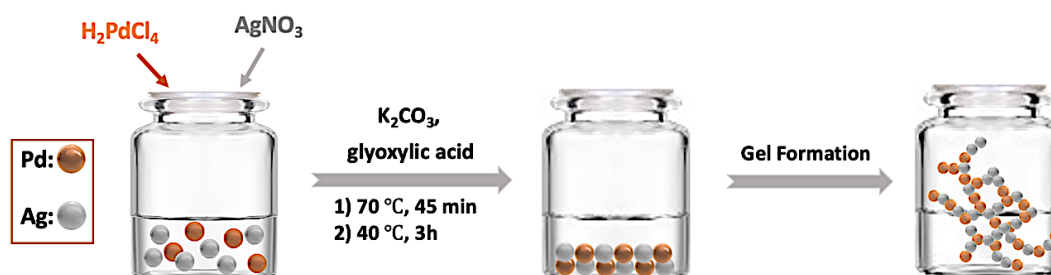

**Figure S1.** Schematic of the general fabrication process of Pd<sub>x</sub>Ag<sub>y</sub> aerogels

## Part S4. Electrochemical Measurements

For each electrochemical reaction, the solution was saturated with either CO<sub>2</sub> or Ar and the rest of the experiment was performed under sealed conditions. All of the electrolysis was performed with stirring. The electrochemical studies were carried out using a CHI 660C potentiostat (CH Instruments, Austin, TX) with a three-electrode set up enclosed in Faraday cage including: 1) aerogel-modified glassy carbon (3 mm diameter) working electrode; 2) Pt wire auxiliary electrode; 3) Ag/AgCl reference electrode. The glassy carbon surface was polished with 1, 0.3, and 0.05 μm alumina slurries. The electrodes were then ultrasonicated in acetonitrile, ethanol and water. The anode and cathode chambers were connected *via* a Nafion membrane. Cyclic Voltammetry (CV) measurements were conducted with a positive initial scan polarity, 5 second quiet, and a scan rate of 0.1 V/s. All potentials were converted from Ag/AgCl (3 M KCl) to RHE ( $E_{\text{RHE}} = E_{\text{Ag/AgCl}}^0 + 0.0591 \times \text{pH} + 0.210$ ).

The reported Faradaic efficiency (FE) and current density ( $j$ ) are average values based on five reactions run with GC measurements taken every 15 min for 2.5 h. It should be noted that all the reported current density has been calculated based on the geometrical electrode dimensions (3mm diameter).

The FE of the CO and H<sub>2</sub> products was *via* either Eq. S1:

Eq. S1:

$$\text{FE} = \frac{2 \times 96485 \text{ (C/mol)} \times V \text{ (mL/min)} \times 10^{-6} \text{ (m}^3\text{/mL)} \times v \text{ (vol.\%)} \times 10^5 \text{ (N/m}^2\text{)}}{8.314 \text{ (N.m/mol.K)} \times 298.15 \text{ K} \times I_{\text{total}} \text{ (C/s)} \times 60 \text{ (s/min)}}$$

$v$  (vol.%) = Volume concentration of the products

$V$  (mL/min) = Gas flow rate measured by a flow meter at room temperature under ambient pressure.  $I_{\text{total}}$  (C/s) = cell current.

Liquid products were analyzed by <sup>1</sup>H NMR spectrometry. After 2.5 h of electrolysis, 350 μL of the catholyte was mixed with 30 μL of D<sub>2</sub>O serving as an internal standard.

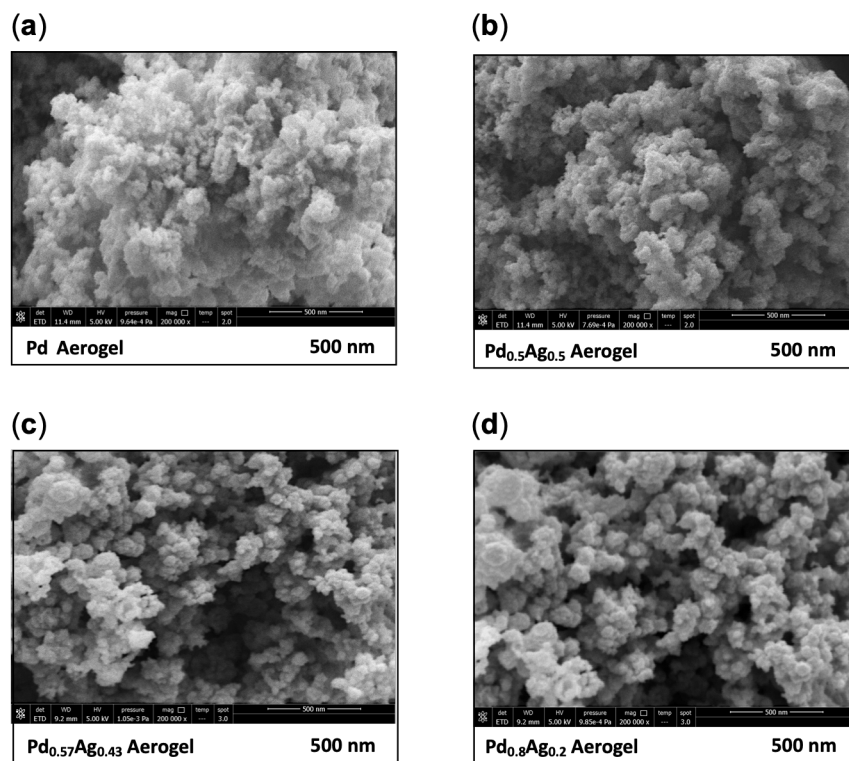

**Figure S2.** Scanning Electron Microscopy (SEM) of (a) Pd; (b) Pd<sub>0.5</sub>Ag<sub>0.5</sub>; (c) Pd<sub>0.57</sub>Ag<sub>0.43</sub>; and (d) Pd<sub>0.8</sub>Ag<sub>0.2</sub> aerogels with a scale bar of 500 nm.

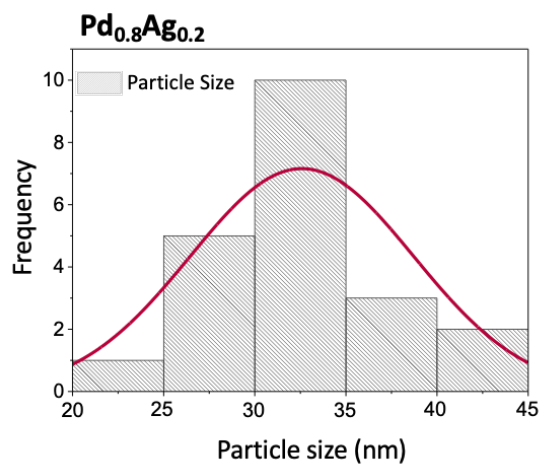

**Figure S3.** Particle size distribution histogram of Pd<sub>0.8</sub>Ag<sub>0.2</sub>

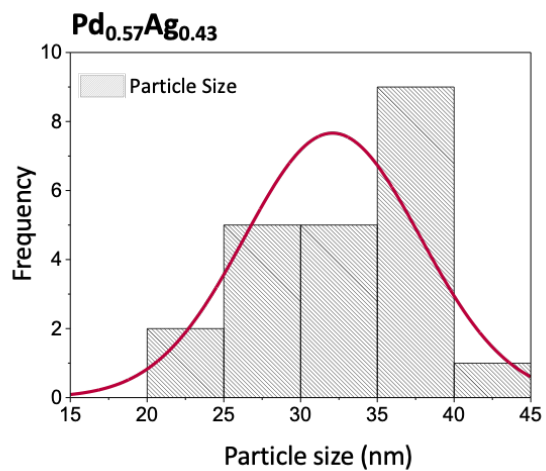

**Figure S4.** Particle size distribution histogram of Pd<sub>0.57</sub>Ag<sub>0.43</sub>

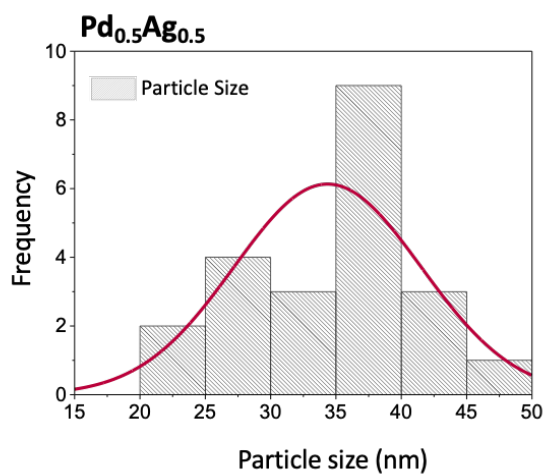

**Figure S5.** Particle size distribution histogram of Pd<sub>0.5</sub>Ag<sub>0.5</sub>

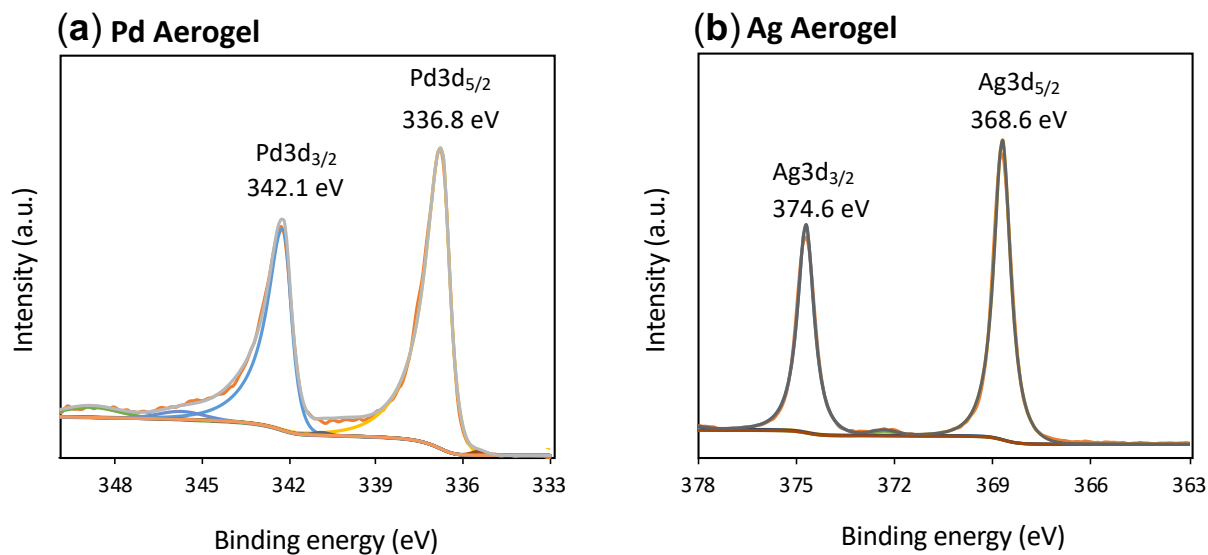

**Figure S6.** X-ray Photoelectron Spectroscopy (XPS) characterization of (a) Pd 3d; (b) Ag 3d of monometallic Pd and Ag aerogels.

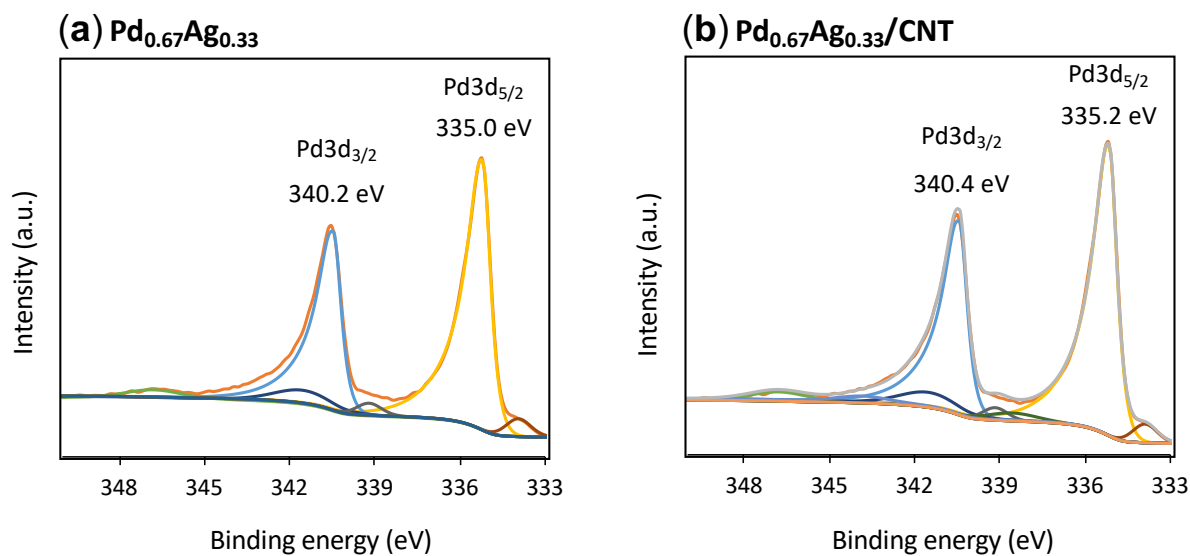

**Figure S7.** Pd 3d X-ray Photoelectron Spectroscopy (XPS) characterization of the bimetallic Pd<sub>0.67</sub>Ag<sub>0.33</sub> and Pd<sub>0.67</sub>Ag<sub>0.33</sub>/CNT.

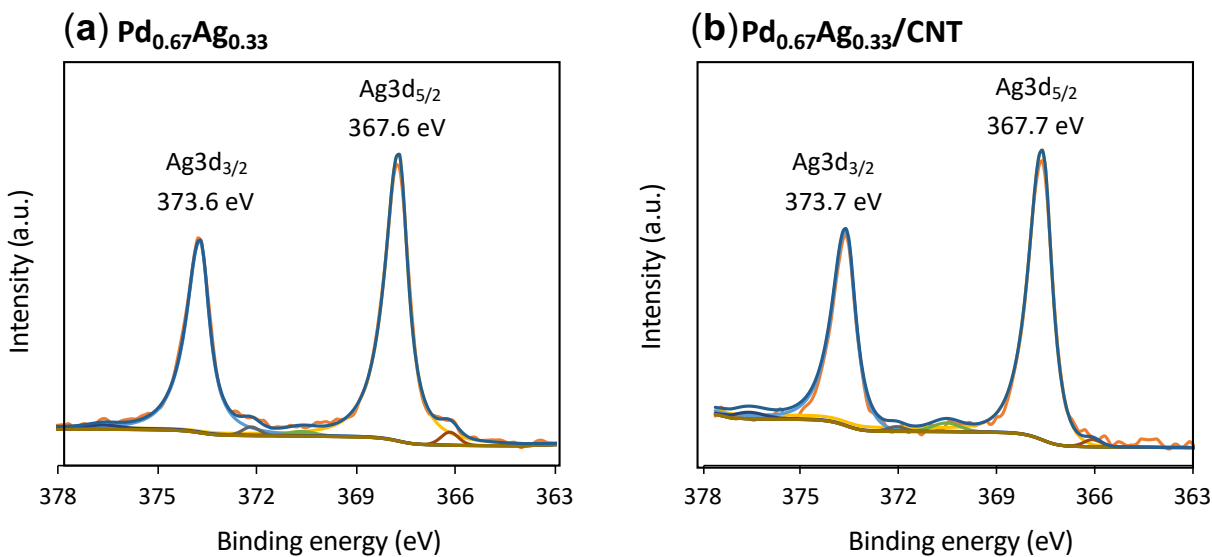

**Figure S8.** Ag 3d X-ray Photoelectron Spectroscopy (XPS) characterization of the bimetallic  $\text{Pd}_{0.67}\text{Ag}_{0.33}$  and  $\text{Pd}_{0.67}\text{Ag}_{0.33}/\text{CNT}$ .

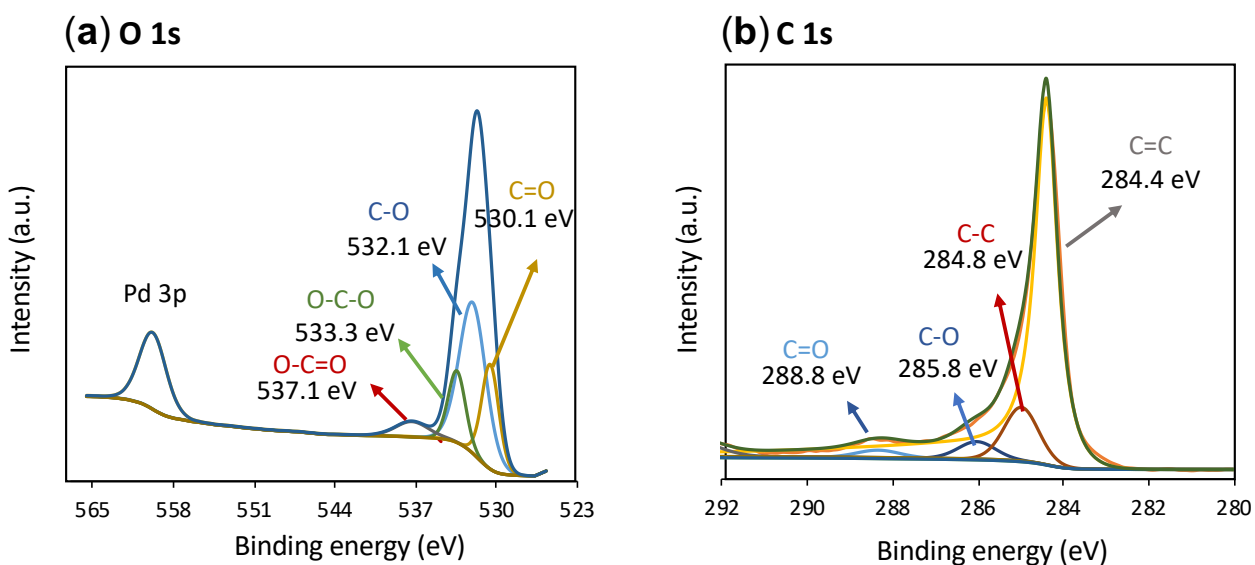

**Figure S9.** X-ray Photoelectron Spectroscopy (XPS) characterization of the monometallic Pd aerogel including (a) O 1s; and (b) C 1s spectra.



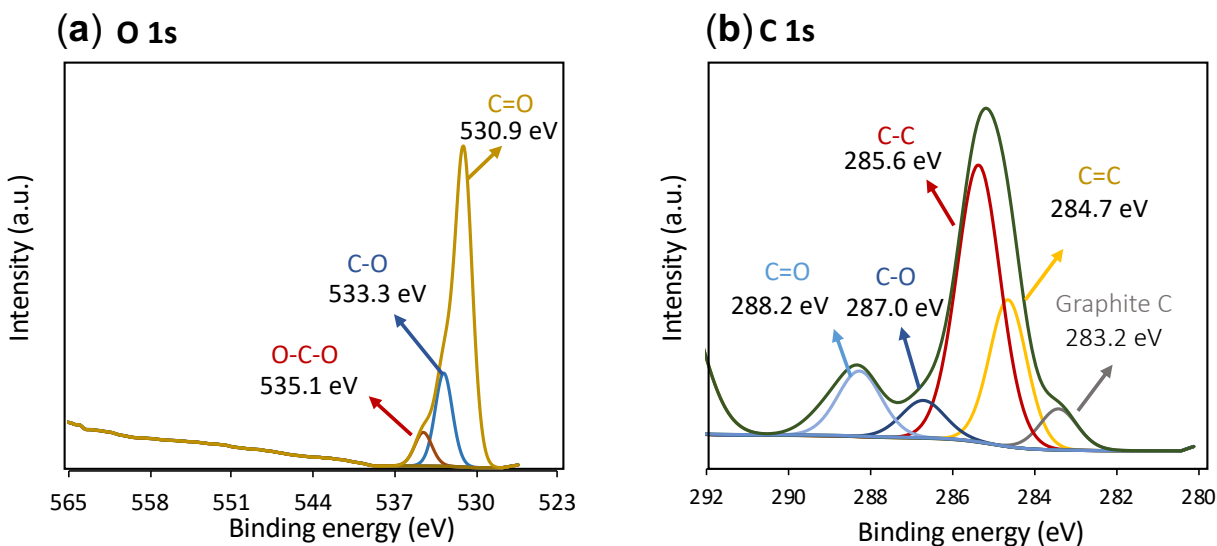

**Figure S10.** X-ray Photoelectron Spectroscopy (XPS) characterization of the monometallic Ag aerogel including (a) O 1s; and (b) C 1s spectra.

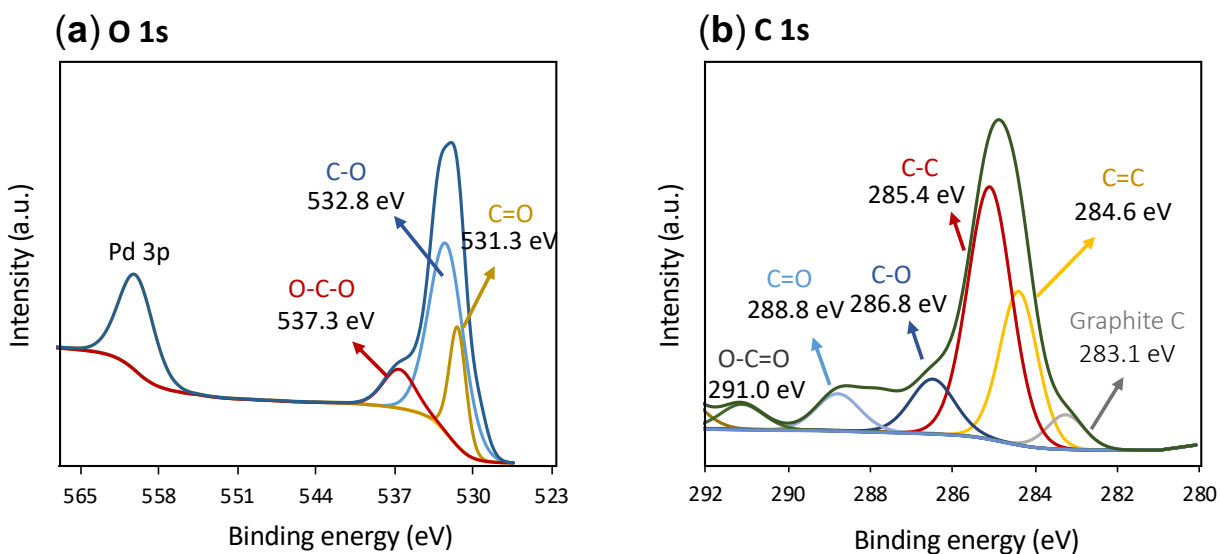

**Figure S11.** X-ray Photoelectron Spectroscopy (XPS) characterization of the bimetallic Pd<sub>0.67</sub>Ag<sub>0.33</sub> aerogel including (a) O 1s; and (b) C 1s spectra.

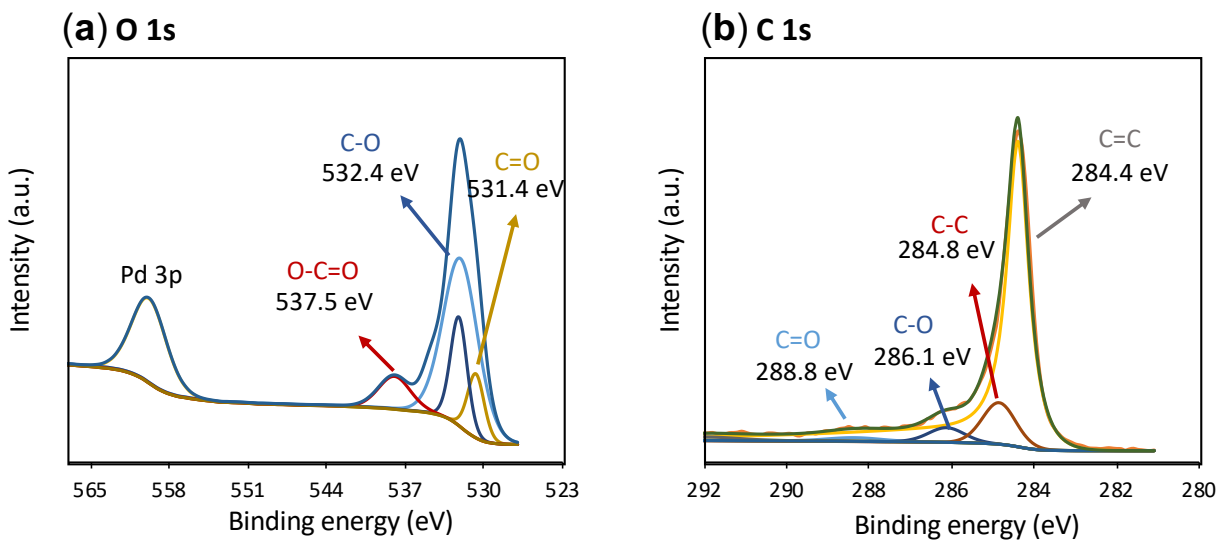

**Figure S12.** X-ray Photoelectron Spectroscopy (XPS) characterization of the bimetallic Pd<sub>0.67</sub>Ag<sub>0.33</sub>/CNT aerogel including (a) O 1s; and (b) C 1s spectra.

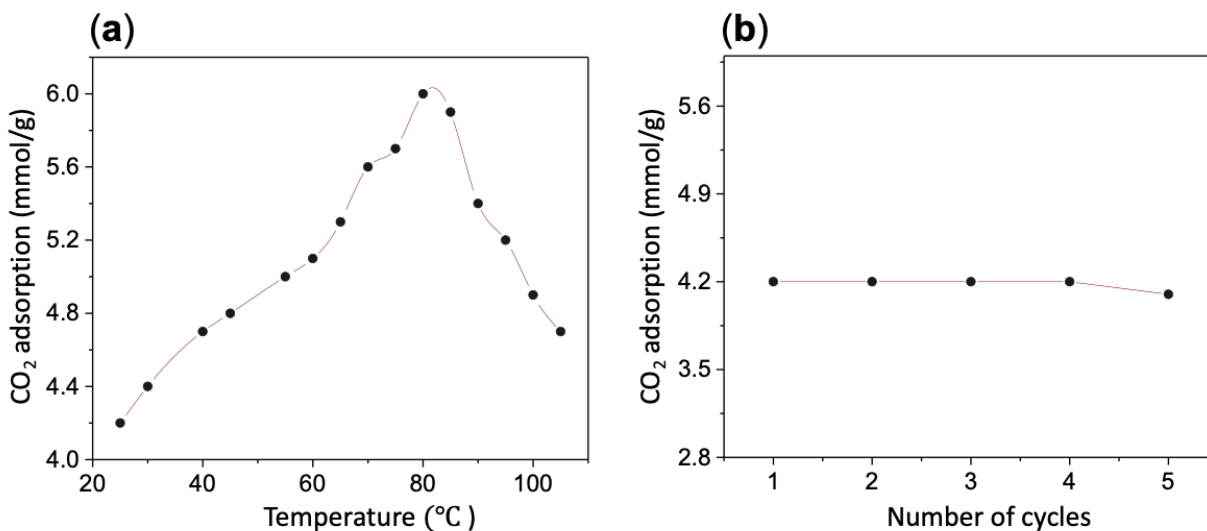

**Figure S13.** (a) CO<sub>2</sub> adsorption of Pd<sub>0.67</sub>Ag<sub>0.33</sub> at variable temperature (25 °C-110 °C). (b) Cyclical adsorption/desorption of CO<sub>2</sub> at 80 °C, CO<sub>2</sub> flow rate = 50 sccm.

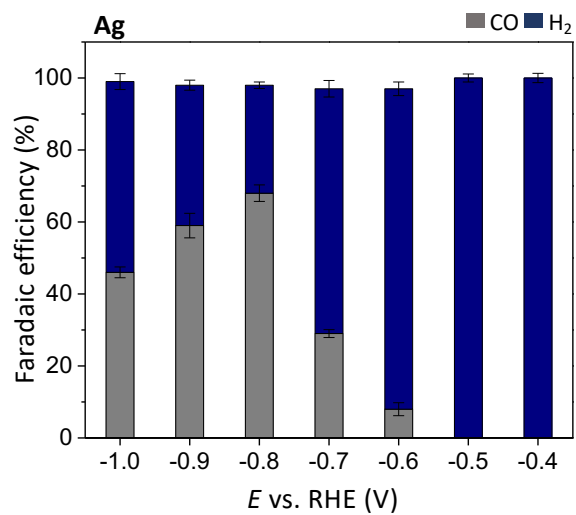

**Figure S14.** Faradaic efficiency (FE) of Ag aerogel after 2.5 h electrolysis at -0.4, -0.5, -0.6, -0.7, -0.8, -0.9, and -1.0 V vs. RHE in 0.1 M NaHCO<sub>3</sub>.

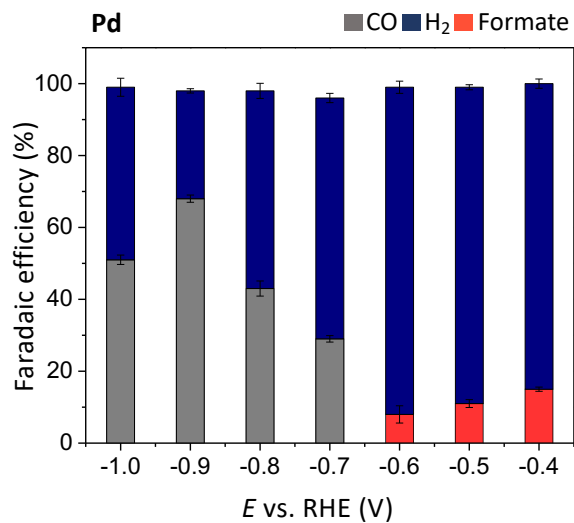

**Figure S15.** Faradaic efficiency (FE) of the Pd aerogel after 2.5 h electrolysis at -0.4, -0.5, -0.6, -0.7, -0.8, -0.9, and -1.0 V vs. RHE in 0.1 M NaHCO<sub>3</sub>.

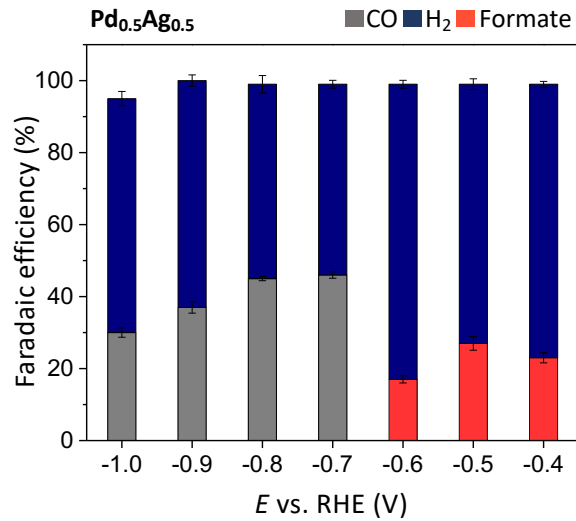

**Figure S16.** Faradaic efficiency (FE) of the Pd<sub>0.5</sub>Ag<sub>0.5</sub> aerogel after 2.5 h electrolysis at -0.4, -0.5, -0.6, -0.7, -0.8, -0.9, and -1.0 V vs. RHE in 0.1 M NaHCO<sub>3</sub>.

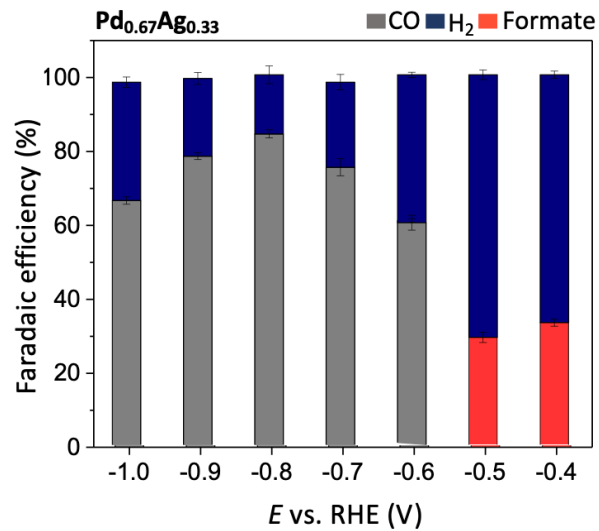

**Figure S17.** Faradaic efficiency (FE) of the Pd<sub>0.67</sub>Ag<sub>0.33</sub> aerogel after 2.5 h electrolysis at -0.4, -0.5, -0.6, -0.7, -0.8, -0.9, and -1.0 V vs. RHE in 0.1 M NaHCO<sub>3</sub>.

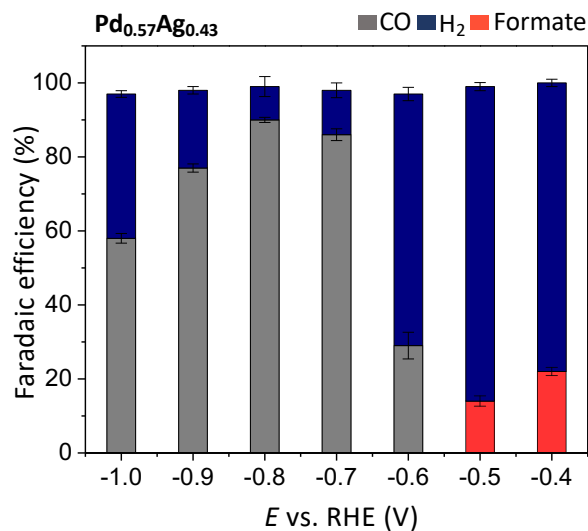

**Figure S18.** Faradaic efficiency (FE) of the Pd<sub>0.57</sub>Ag<sub>0.43</sub> aerogel after 2.5 h electrolysis at -0.4, -0.5, -0.6, -0.7, -0.8, -0.9, and -1.0 V vs. RHE in 0.1 M NaHCO<sub>3</sub>.

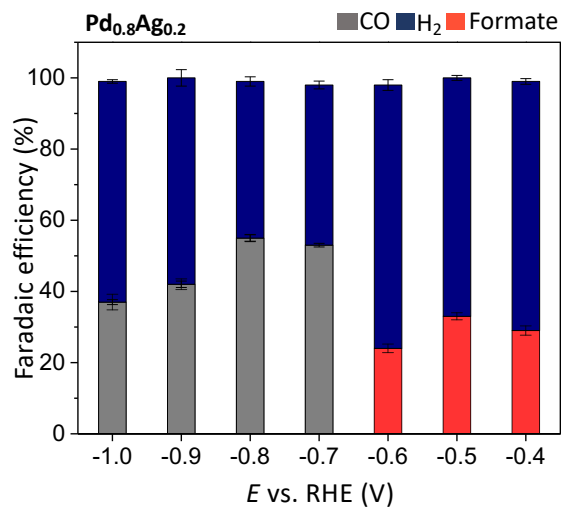

**Figure S19.** Faradaic efficiency (FE) of the Pd<sub>0.8</sub>Ag<sub>0.2</sub> aerogel after 2.5 h electrolysis at -0.4, -0.5, -0.6, -0.7, -0.8, -0.9, and -1.0 V vs. RHE in 0.1 M NaHCO<sub>3</sub>.

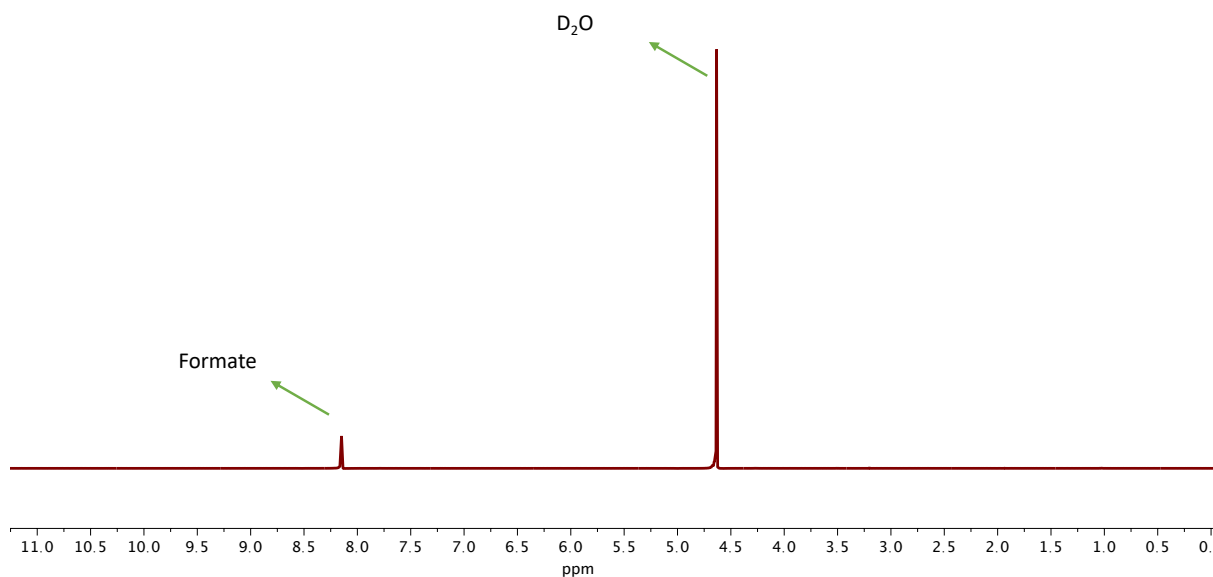

**Figure S20.**  $^1\text{H}$  NMR spectra example of  $\text{Pd}_{0.67}\text{Ag}_{0.33}/\text{CNT}$  after 2 h electrolysis.

**Table S1.** Product analysis of the synthesized aerogels after electrochemical  $\text{CO}_2$  reduction. The reported data are the average values of three separate measurements taken from five individual reaction runs at various potentials.

| Catalyst | Electrolyte              | V vs. RHE | $j$ ( $\text{mA}/\text{cm}^2$ ) | FE% (CO)     | FE% (Formate) | FE% ( $\text{H}_2$ ) | Ref.         |
|----------|--------------------------|-----------|---------------------------------|--------------|---------------|----------------------|--------------|
| Ag       | $\text{NaHCO}_3$ (0.1 M) | -0.4      | -0.33                           | -            | -             | $100 \pm 1.3$        | Current work |
|          | $\text{NaHCO}_3$ (0.1 M) | -0.5      | -0.65                           | -            | -             | $100 \pm 1.1$        | Current work |
|          | $\text{NaHCO}_3$ (0.1 M) | -0.6      | -1.3                            | $8 \pm 1.8$  | -             | $89 \pm 1.9$         | Current work |
|          | $\text{NaHCO}_3$ (0.1 M) | -0.7      | -2.2                            | $29 \pm 1.1$ | -             | $68 \pm 2.3$         | Current work |
|          | $\text{NaHCO}_3$ (0.1 M) | -0.8      | -2.6                            | $68 \pm 2.3$ | -             | $30 \pm 0.9$         | Current work |
|          | $\text{NaHCO}_3$ (0.1 M) | -0.9      | -3.7                            | $59 \pm 3.4$ | -             | $39 \pm 1.4$         | Current work |
|          | $\text{NaHCO}_3$ (0.1 M) | -1.0      | -4.2                            | $46 \pm 1.5$ | -             | $53 \pm 2.2$         | Current work |

| <b>Catalyst</b>                           | Electrolyte                | V vs. RHE | $j$ (mA/cm <sup>2</sup> ) | FE% (CO) | FE% (Formate) | FE% (H <sub>2</sub> ) | <b>Ref.</b>  |
|-------------------------------------------|----------------------------|-----------|---------------------------|----------|---------------|-----------------------|--------------|
| <b>Pd</b>                                 | NaHCO <sub>3</sub> (0.1 M) | -0.4      | -1.1                      | -        | 15±0.6        | 85±1.3                | Current work |
|                                           | NaHCO <sub>3</sub> (0.1 M) | -0.5      | -1.5                      | -        | 11±1.1        | 88±0.7                | Current work |
|                                           | NaHCO <sub>3</sub> (0.1 M) | -0.6      | -2.2                      | -        | 8±2.4         | 91±1.7                | Current work |
|                                           | NaHCO <sub>3</sub> (0.1 M) | -0.7      | -3.8                      | 29±0.9   | -             | 57±1.3                | Current work |
|                                           | NaHCO <sub>3</sub> (0.1 M) | -0.8      | -3.4                      | 43±2.1   | -             | 55±2.1                | Current work |
|                                           | NaHCO <sub>3</sub> (0.1 M) | -0.9      | -6.1                      | 68±1     | -             | 30±0.6                | Current work |
|                                           | NaHCO <sub>3</sub> (0.1 M) | -1.0      | -6.8                      | 51±1.3   | -             | 48±2.5                | Current work |
| <b>Pd<sub>0.5</sub>Ag<sub>0.5</sub></b>   | NaHCO <sub>3</sub> (0.1 M) | -0.4      | -2.2                      | -        | 23±1.4        | 76±0.8                | Current work |
|                                           | NaHCO <sub>3</sub> (0.1 M) | -0.5      | -3.2                      | -        | 27±1.9        | 72±1.5                | Current work |
|                                           | NaHCO <sub>3</sub> (0.1 M) | -0.6      | -3.4                      | -        | 17±1          | 82±1.1                | Current work |
|                                           | NaHCO <sub>3</sub> (0.1 M) | -0.7      | -3.5                      | 46±0.9   | -             | 53±1.1                | Current work |
|                                           | NaHCO <sub>3</sub> (0.1 M) | -0.8      | -3.7                      | 45±0.6   | -             | 54±2.4                | Current work |
|                                           | NaHCO <sub>3</sub> (0.1 M) | -0.9      | -4.5                      | 37±1.6   | -             | 63±1.6                | Current work |
|                                           | NaHCO <sub>3</sub> (0.1 M) | -1.0      | -5.1                      | 30±1.3   | -             | 65±2                  | Current work |
| <b>Pd<sub>0.67</sub>Ag<sub>0.33</sub></b> | NaHCO <sub>3</sub> (0.1 M) | -0.4      | -2.9                      | -        | 23±1          | 76±1                  | Current work |
|                                           | NaHCO <sub>3</sub> (0.1 M) | -0.5      | -6.8                      | -        | 11±1.4        | 88±1.3                | Current work |
|                                           | NaHCO <sub>3</sub> (0.1 M) | -0.6      | -14.1                     | 36±0.5   | -             | 62±0.7                | Current work |

|                                           | Electrolyte                | V vs. RHE | $j$ (mA/cm <sup>2</sup> ) | FE% (CO) | FE% (Formate) | FE% (H <sub>2</sub> ) | Ref.         |
|-------------------------------------------|----------------------------|-----------|---------------------------|----------|---------------|-----------------------|--------------|
| <b>Pd<sub>0.67</sub>Ag<sub>0.33</sub></b> | NaHCO <sub>3</sub> (0.1 M) | -0.7      | -20.2                     | 75±2.3   | -             | 23±2.1                | Current work |
|                                           | NaHCO <sub>3</sub> (0.1 M) | -0.8      | -23.4                     | 84±1.1   | -             | 16±2.4                | Current work |
|                                           | NaHCO <sub>3</sub> (0.1 M) | -0.9      | -34.0                     | 70±0.9   | -             | 29±1.6                | Current work |
|                                           | NaHCO <sub>3</sub> (0.1 M) | -1.0      | -41.4                     | 56±1     | -             | 42±1.4                | Current work |
| <b>Pd<sub>0.8</sub>Ag<sub>0.2</sub></b>   | NaHCO <sub>3</sub> (0.1 M) | -0.4      | -2.4                      | -        | 29±1.1        | 70±0.8                | Current work |
|                                           | NaHCO <sub>3</sub> (0.1 M) | -0.5      | -3.6                      | -        | 33±1.7        | 67±0.7                | Current work |
|                                           | NaHCO <sub>3</sub> (0.1 M) | -0.6      | -5.9                      | -        | 24±3.1        | 72±1.5                | Current work |
|                                           | NaHCO <sub>3</sub> (0.1 M) | -0.7      | -7.6                      | 53±0.5   | -             | 45±1.1                | Current work |
|                                           | NaHCO <sub>3</sub> (0.1 M) | -0.8      | -8.2                      | 55±1     | -             | 44±1.3                | Current work |
|                                           | NaHCO <sub>3</sub> (0.1 M) | -0.9      | -8.7                      | 42±0.9   | -             | 58±2.3                | Current work |
|                                           | NaHCO <sub>3</sub> (0.1 M) | -1.0      | -10.2                     | 37±0.7   | -             | 62±0.5                | Current work |
| <b>Pd<sub>0.57</sub>Ag<sub>0.43</sub></b> | NaHCO <sub>3</sub> (0.1 M) | -0.4      | -2.7                      | -        | 22±1.1        | 78±1                  | Current work |
|                                           | NaHCO <sub>3</sub> (0.1 M) | -0.5      | -4.6                      | -        | 14±1.1        | 85±1.1                | Current work |
|                                           | NaHCO <sub>3</sub> (0.1 M) | -0.6      | -12.8                     | 29±3.6   | -             | 68±1.8                | Current work |
|                                           | NaHCO <sub>3</sub> (0.1 M) | -0.7      | -16.6                     | 62±1.6   | -             | 36±2                  | Current work |
|                                           | NaHCO <sub>3</sub> (0.1 M) | -0.8      | -19.7                     | 79±0.7   | -             | 18±2.7                | Current work |
|                                           | NaHCO <sub>3</sub> (0.1 M) | -0.9      | -24.8                     | 57±1.1   | -             | 43±1                  | Current work |
|                                           | NaHCO <sub>3</sub> (0.1 M) | -1.0      | -35.8                     | 50±1.3   | -             | 49±0.9                | Current work |



| <b>Catalyst</b>                               | Electrolyte                | V vs. RHE | $j$ (mA/cm <sup>2</sup> ) | FE% (CO) | FE% (Formate) | FE% (H <sub>2</sub> ) | <b>Ref.</b>  |
|-----------------------------------------------|----------------------------|-----------|---------------------------|----------|---------------|-----------------------|--------------|
| <b>Pd<sub>0.67</sub>Ag<sub>0.33</sub>/CNT</b> | NaHCO <sub>3</sub> (0.1 M) | -0.4      | -4.1                      | -        | 28±2.2        | 70±0.8                | Current work |
|                                               | NaHCO <sub>3</sub> (0.1 M) | -0.5      | -6.5                      | -        | 12±1          | 88±3.4                | Current work |
|                                               | NaHCO <sub>3</sub> (0.1 M) | -0.6      | -27.9                     | 45±1     | -             | 53±1.2                | Current work |
|                                               | NaHCO <sub>3</sub> (0.1 M) | -0.7      | -38.4                     | 91±1.4   | -             | 7±1                   | Current work |
|                                               | NaHCO <sub>3</sub> (0.1 M) | -0.8      | -45.8                     | 88±2.3   | -             | 11±1.1                | Current work |
|                                               | NaHCO <sub>3</sub> (0.1 M) | -0.9      | -57.1                     | 73±0.7   | -             | 27±0.9                | Current work |
|                                               | NaHCO <sub>3</sub> (0.1 M) | -1.0      | -60.3                     | 59±1.1   | -             | 38±1.4                | Current work |
| <b>AgNPs</b>                                  | EMIN-BF <sub>4</sub>       | N/A       | -0.61                     | 96       | -             | 4                     | 3            |
| <b>AgNPs</b>                                  | KHCO <sub>3</sub> (0.1 M)  | -0.7      | -0.4                      | 45       | -             | 18                    | 4            |
| <b>Ag foil</b>                                | KHCO <sub>3</sub> (0.1 M)  | -0.8      | -0.01                     | 2.2      | -             | 75                    | 4            |
| <b>Ag Nano-coarals</b>                        | KHCO <sub>3</sub> (0.1 M)  | -0.7      | -6.6                      | 95       | -             | 4                     | 4            |
| <b>Nanoporous Ag</b>                          | KHCO <sub>3</sub> (0.5 M)  | -0.8      | -0.19                     | 92       | -             | 7                     | 5            |
| <b>Pd-foile</b>                               | KHCO <sub>3</sub> (0.1 M)  | -0.8      | -1.4                      | 28.3     | -             | -                     | 6            |
| <b>PdNPs</b>                                  | KHCO <sub>3</sub> (1 M)    | -0.7      | -22.9                     | 93.4     | -             | -                     | 7            |
| <b>PdNPs</b>                                  | KHCO <sub>3</sub> (0.1 M)  | -0.89     | -8.9                      | 91.2     | -             | -                     | 8            |

| Catalyst   | Electrolyte               | V vs. RHE | $j$ (mA/cm <sup>2</sup> ) | FE% (CO) | FE% (Formate) | FE% (H <sub>2</sub> ) | Ref. |
|------------|---------------------------|-----------|---------------------------|----------|---------------|-----------------------|------|
| Pd/C       | KHCO <sub>3</sub> (0.5 M) | -0.6      | -0.3                      | 40       | -             | -                     | 9    |
| Pd/C       | KHCO <sub>3</sub> (0.5 M) | -0.1      | -2.5                      | -        | 90            | -                     | 10   |
| Pd-PAN/CNT | KHCO <sub>3</sub> (0.1 M) | -0.15     | -4                        | -        | 83            | -                     | 11   |

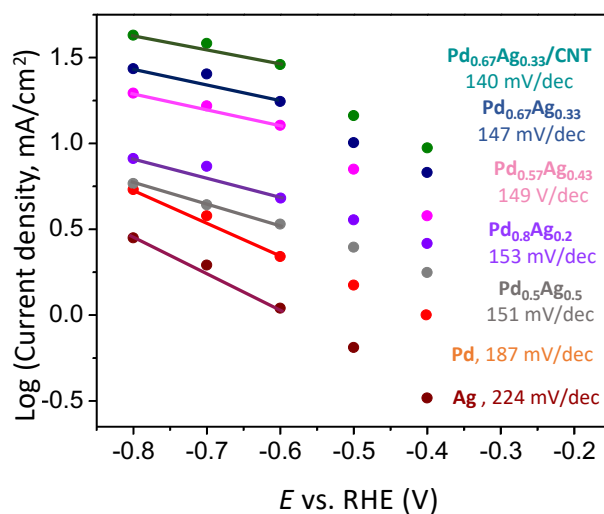

**Figure S21.** Tafel plots for the geometric partial current density of the CO products belongs to Pd<sub>0.5</sub>Ag<sub>0.5</sub>, Pd<sub>0.57</sub>Ag<sub>0.43</sub>, Pd<sub>0.67</sub>Ag<sub>0.33</sub>, and Pd<sub>0.8</sub>Ag<sub>0.2</sub>, and Pd<sub>0.67</sub>Ag<sub>0.33</sub>/CNT in 0.1 M NaHCO<sub>3</sub> at -0.6, -0.7, -0.8, -0.9 V vs. RHE. The Tafel slopes are indicated on the right.

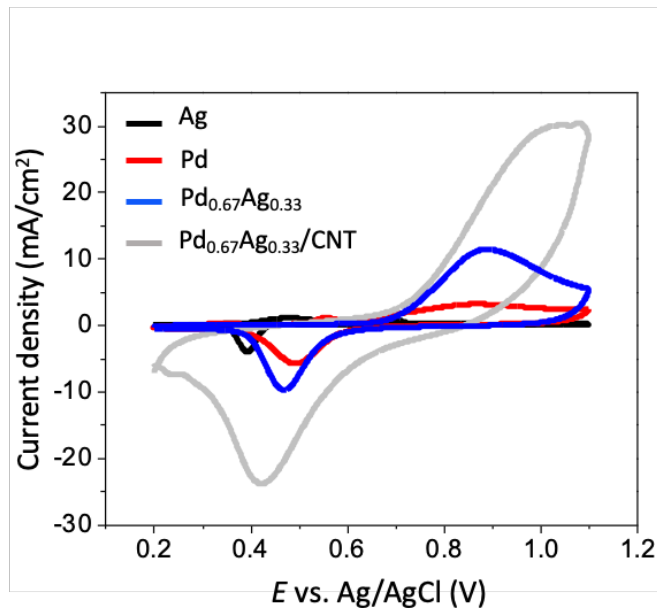

**Figure S22:** CVs at the scan rate of 20 mV/s of the prepared aerogel electrodes in 0.5 M H<sub>2</sub>SO<sub>4</sub> + 1 mM CuSO<sub>4</sub> solution.

**Table S2:** Real surface area (RSA) determined by Cu under potential deposition (Cu UPD): geometric surface area of the electrode is 0.072 cm<sup>2</sup>.

| Electrode                                          | Charge (μC) | RSA (cm <sup>2</sup> ) | Surface area increased (times) |
|----------------------------------------------------|-------------|------------------------|--------------------------------|
| Ag aerogel                                         | 177.35      | 0.44                   | 6.2                            |
| Pd aerogel                                         | 828.57      | 2.04                   | 29.1                           |
| Pd <sub>0.67</sub> Ag <sub>0.33</sub> aerogel      | 1117.14     | 2.74                   | 39.2                           |
| Pd <sub>0.67</sub> Ag <sub>0.33</sub> /CNT aerogel | 3764.29     | 9.25                   | 132.1                          |

## Part S5. References

- 1 A. Shafaei Douk, H. Saravani and M. Noroozifar, *Electrochim. Acta*, 2018, **275**, 182–191.
- 2 A. S. Douk, H. Saravani, M. Z. Yazdan Abad and M. Noroozifar, *Compos. Part B Eng.*, 2019, **172**, 309–315.
- 3 B. a Rosen, A. Salehi-khojin, M. R. Thorson, W. Zhu, D. T. Whipple, P. J. a Kenis and R. I. Masel, *Science.*, 2011, **334**, 643–644.
- 4 Y.-C. Hsieh, S. D. Senanayake, Y. Zhang, W. Xu and D. E. Polyansky, *ACS Catal.*, 2015, **5**, 5349–5356.
- 5 Q. Lu, J. Rosen, Y. Zhou, G. S. Hutchings, Y. C. Kimmel, J. G. Chen and F. Jiao, *Nat. Commun.*, 2014, **5**, 3242.
- 6 Y. Hori, H. Wakebe, T. Tsukamoto and O. Koga, *Electrochim. Acta*, 1994, **39**, 1833–1839.
- 7 D. Gao, H. Zhou, F. Cai, D. Wang, Y. Hu, B. Jiang, W.-B. Cai, X. Chen, R. Si, F. Yang, S. Miao, J. Wang, G. Wang and X. Bao, *Nano Res.*, 2017, **10**, 2181–2191.
- 8 D. Gao, H. Zhou, J. Wang, S. Miao, F. Yang, G. Wang, J. Wang and X. Bao, *J. Am. Chem. Soc.*, 2015, **137**, 4288–4291.
- 9 W. Sheng, S. Kattel, S. Yao, B. Yan, Z. Liang, C. J. Hawxhurst, Q. Wu and J. G. Chen, *Energy Environ. Sci.*, 2017, **10**, 1180–1185.
- 10 X. Min and M. W. Kanan, *J. Am. Chem. Soc.*, 2015, **137**, 4701–4708.
- 11 C. Zhao, Z. Yin and J. Wang, *ChemElectroChem*, 2015, **2**, 1974–1982.
